# Supplementary material for: Preparation of an amino-modified biochar supported sulfide nanoscale zero-valent iron composite and its efficient removal of U(vi) from wastewater by adsorption and reduction
Source: Royal Society of Chemistry journal article supplement (doi:10.1039/d3nj05479a), 2024-01-01
Supplement: d3nj05479a1.pdf [file d3nj05479a1.pdf]

## Preparation of amino-modified biochar supported sulfide nanoscale zero-valent iron composite and its efficient removal of U(VI) from wastewater by adsorption and reduction

Yunkai Sun,<sup>\*a,b,c</sup> Na Yin,<sup>b</sup> Cheng Liu,<sup>b</sup> Yi Ding,<sup>a,c</sup> and Pengfei Yang<sup>\*b</sup>

a. School of Chemical Engineering and Materials, Changzhou Institute of Technology, Changzhou, 213032, China.

b. School of Chemistry and Chemical Engineering, Institution, University of South China, Hengyang, 421001, China.

c. Industrial college of carbon fiber and new materials, Changzhou Institute of Technology, Changzhou, 213032, China.

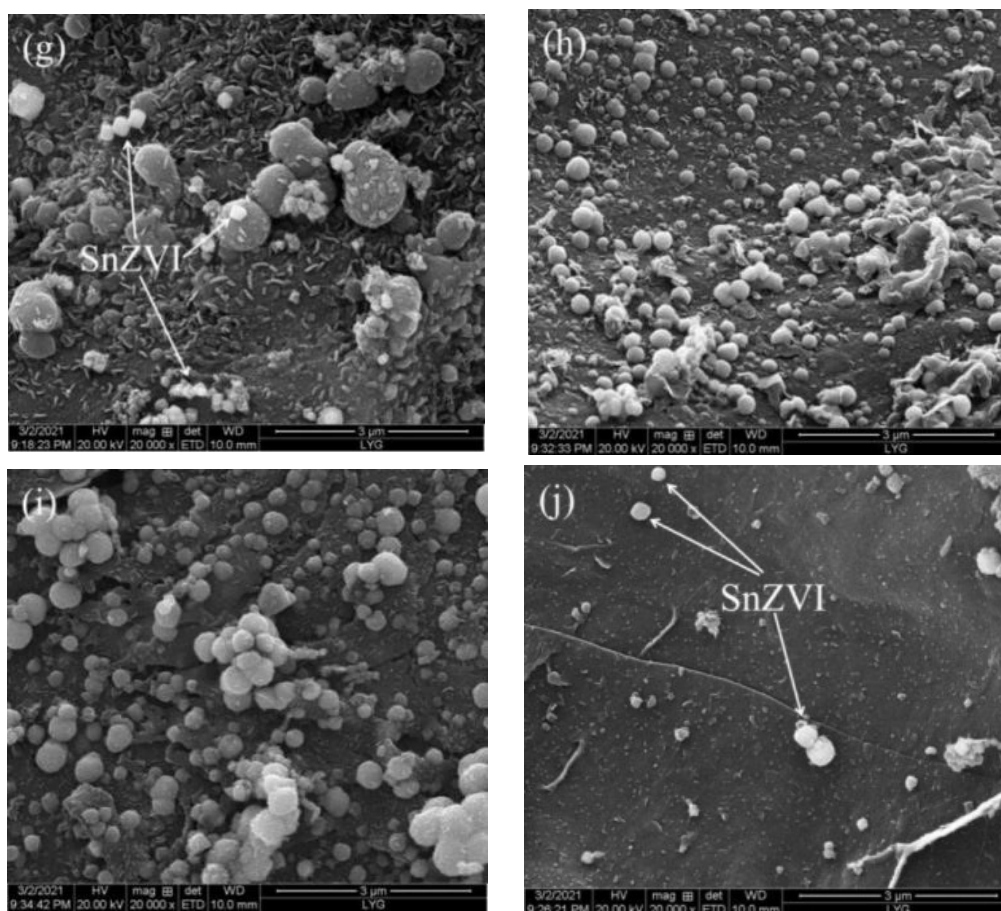

**Figure S1.** SEM images of SnZVI-BC-NH<sub>2</sub> with C: Fe mass ratios of 1: 1 (g), 1: 2 (h), and 1: 3 (i), and SEM image of SnZVI-BC with a C: Fe mass ratio of 1: 2 (j).

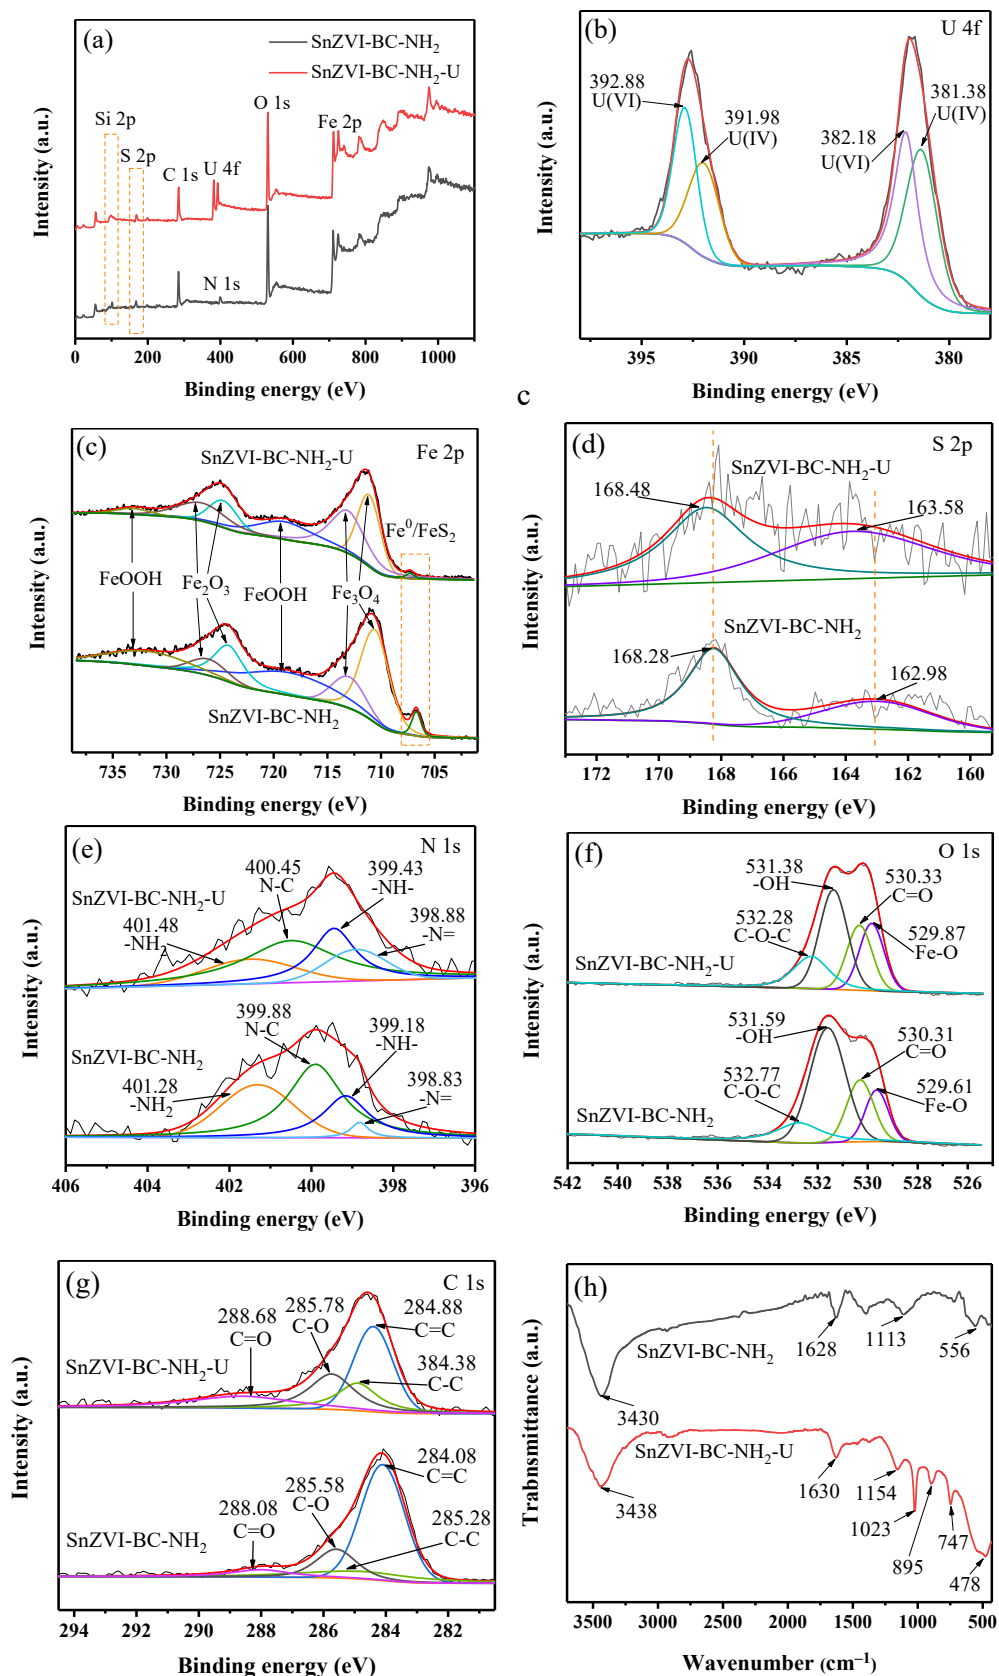

**Figure S2.** XPS spectra of SnZVI-BC-NH<sub>2</sub> before and after adsorption of U(VI)(a), high-resolution XPS spectra of U 4f(b), Fe 2p (c), S 2p(d), N 1s(e), O 1s(f), and C 1s(g). FT-IR spectra of SnZVI-BC-NH<sub>2</sub> before and after adsorption of U(VI) (h).

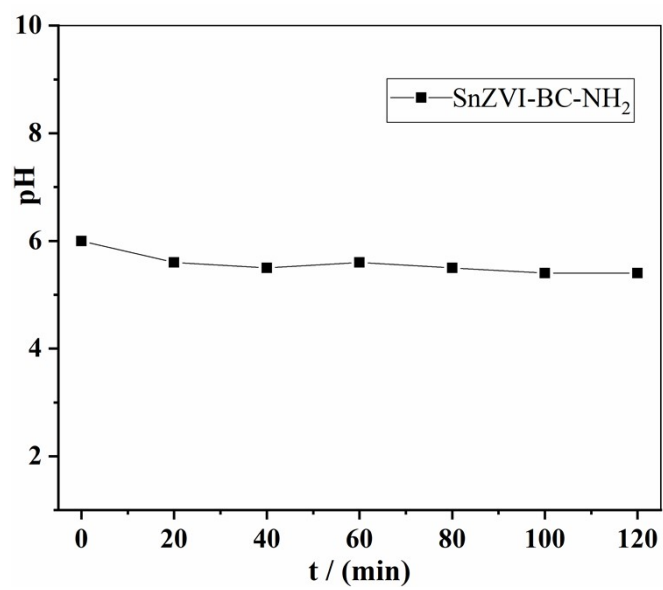

**Figure S3.** Change of pH during the U(VI) removal process by SnZVI-BC-NH<sub>2</sub> ( pH = 6, T = 298 K, V = 50 mL, C<sub>0</sub>(U) = 20 mg·L<sup>-1</sup>).
